RESEARCH ARTICLE

# Projected Future Vegetation Changes for the Northwest United States and Southwest Canada at a Fine Spatial Resolution Using a Dynamic Global Vegetation Model

Sarah L. Shafer<sup>1\*</sup>, Patrick J. Bartlein<sup>2</sup>, Elizabeth M. Gray<sup>3</sup>, Richard T. Peltier<sup>4</sup>

**1** U. S. Geological Survey, Corvallis, Oregon, United States of America, **2** Department of Geography, University of Oregon, Eugene, Oregon, United States of America, **3** The Nature Conservancy, Maryland/DC, Bethesda, Maryland, United States of America, **4** U. S. Geological Survey, Denver, Colorado, United States of America

\* [sshafer@usgs.gov](mailto:sshafer@usgs.gov)

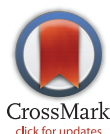

## OPEN ACCESS

**Citation:** Shafer SL, Bartlein PJ, Gray EM, Peltier RT (2015) Projected Future Vegetation Changes for the Northwest United States and Southwest Canada at a Fine Spatial Resolution Using a Dynamic Global Vegetation Model. PLoS ONE 10(10): e0138759. doi:10.1371/journal.pone.0138759

**Editor:** Benjamin Poulter, Montana State University, UNITED STATES

**Received:** May 1, 2014

**Accepted:** September 3, 2015

**Published:** October 21, 2015

**Copyright:** This is an open access article, free of all copyright, and may be freely reproduced, distributed, transmitted, modified, built upon, or otherwise used by anyone for any lawful purpose. The work is made available under the [Creative Commons CC0](https://creativecommons.org/licenses/by/4.0/) public domain dedication.

**Data Availability Statement:** The simulated biome data are available from the U.S. Geological Survey at <http://dx.doi.org/10.5066/F73X84PH>. The regridded historical and potential future climate data are available from the U.S. Geological Survey at <http://dx.doi.org/10.5066/F7H70CWW>.

**Funding:** Funding for this research was provided by the U.S. Geological Survey National Climate Change and Wildlife Science Center (<https://nccwsc.usgs.gov/>). SLS and RTP were supported by the U.S. Geological Survey Climate and Land Use Change Research and Development Program (<http://www.usgs.gov/clu>).

## Abstract

Future climate change may significantly alter the distributions of many plant taxa. The effects of climate change may be particularly large in mountainous regions where climate can vary significantly with elevation. Understanding potential future vegetation changes in these regions requires methods that can resolve vegetation responses to climate change at fine spatial resolutions. We used LPJ, a dynamic global vegetation model, to assess potential future vegetation changes for a large topographically complex area of the northwest United States and southwest Canada (38.0–58.0°N latitude by 136.6–103.0°W longitude). LPJ is a process-based vegetation model that mechanistically simulates the effect of changing climate and atmospheric CO<sub>2</sub> concentrations on vegetation. It was developed and has been mostly applied at spatial resolutions of 10-minutes or coarser. In this study, we used LPJ at a 30-second (~1-km) spatial resolution to simulate potential vegetation changes for 2070–2099. LPJ was run using downscaled future climate simulations from five coupled atmosphere-ocean general circulation models (CCSM3, CGCM3.1(T47), GISS-ER, MIROC3.2(medres), UKMO-HadCM3) produced using the A2 greenhouse gases emissions scenario. Under projected future climate and atmospheric CO<sub>2</sub> concentrations, the simulated vegetation changes result in the contraction of alpine, shrub-steppe, and xeric shrub vegetation across the study area and the expansion of woodland and forest vegetation. Large areas of maritime cool forest and cold forest are simulated to persist under projected future conditions. The fine spatial-scale vegetation simulations resolve patterns of vegetation change that are not visible at coarser resolutions and these fine-scale patterns are particularly important for understanding potential future vegetation changes in topographically complex areas.

[usgs.gov/climate\\_landuse/](https://usgs.gov/climate_landuse/)). The funders had no role in study design, data collection and analysis, decision to publish, or preparation of the manuscript.

**Competing Interests:** The authors have read the journal's policy have the following competing interests: SLS and RTP are employed by the U.S. Geological Survey, but in a different part of the organization than the funders of this work. This does not alter the authors' adherence to PLOS ONE policies on sharing data and materials.

## Introduction

Future climate changes may significantly affect the distribution of many plant species. There is substantial evidence from historical and paleoenvironmental records that vegetation has responded to past climate changes. In many cases, variations in climate have produced substantial changes in species distributions, including extirpations and extinctions [1,2]. As a result of the large effects of past climate change on vegetation, a great deal of effort has focused on understanding the potential effects of future climate change on vegetation ranging from individual plant species populations to global biomes [3,4]. These studies have included research on the implications of vegetation change for species and habitat conservation [5], ecosystem services [6], and potential feedbacks of vegetation change to the climate system [7].

A common method for projecting vegetation responses to climate change is the use of numerical vegetation models. These models range in complexity from climate-envelope models based on correlations between climate and species distributions to mechanistic models that simulate the physical processes involved in vegetation responses to climate change [8,9]. The different types of vegetation models have different strengths. Climate-envelope models can be used to simulate many species distributions relatively quickly and are often applied at fine spatial resolutions (e.g., 30-second and finer grids; [10]). However these correlative models do not simulate important processes governing vegetation responses to climate change, such as changes in plant water use efficiency in response to increased atmospheric CO<sub>2</sub> concentrations [11] or the dynamics of important disturbance regimes, such as fire and insect and disease outbreaks. Climate-envelope models are particularly limited in their ability to simulate plant responses over time periods when the correlations between plants and the environmental variables being used to build these models significantly change. Mechanistic models, such as dynamic global vegetation models (DGVMs), do explicitly simulate a number of the physical processes that control vegetation responses to climate change, such as changes in plant water use efficiency or mortality related to changing fire regimes [8,9], although often these processes are simulated in a simplified form. Mechanistic models are frequently applied over large areas at relatively coarse spatial resolutions (e.g., 10-minute or 0.5-degree grids). As a result, the model simulations often do not resolve important finer-scale vegetation patterns that are particularly important in regions of topographic complexity where climate and soil properties may vary significantly over short distances.

In this study, we used the DGVM LPJ [12] to simulate future changes in potential vegetation distributions for a large, topographically complex region of the northwest United States and southwest Canada (Fig 1). LPJ is a process-based vegetation model that has been applied at various regional scales, including East Africa [6], China [13], and western North America [14], but typically at spatial resolutions of 10-minutes or coarser. For topographically complex regions, these coarse spatial resolutions do not resolve many important topographic features and the related patterns in climate and vegetation. An example from our study area is the Cascade Range (Fig 1), a relatively narrow mountain range in western Washington and Oregon that is poorly resolved at coarse spatial resolutions (e.g., [14]), and similar examples can be found for other topographically complex regions of the globe. To be able to better resolve the influence of topography on vegetation, such as changes in vegetation along elevation gradients, we ran LPJ using a 30-second (~1-km) grid containing >6.8 million terrestrial points. This grid produces vegetation simulations with a spatial resolution that is two orders of magnitude finer than that of LPJ simulations using a 10-minute grid. We downscaled climate projections for the 21<sup>st</sup> century from five coupled atmosphere-ocean general circulation models (AOGCMs) to this 30-second grid.

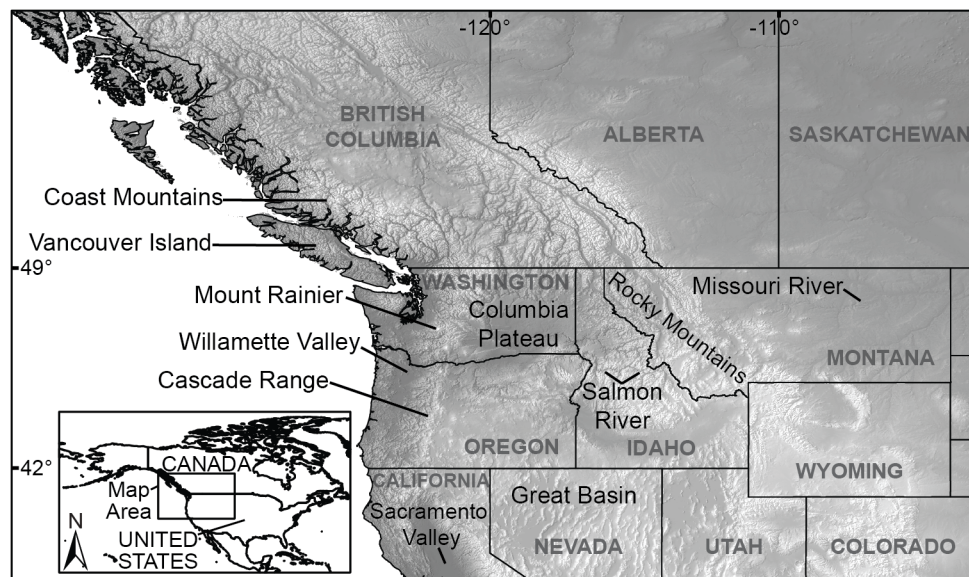

**Fig 1. The study area and some of the physical features described in the text [15].**

doi:10.1371/journal.pone.0138759.g001

LPJ and LPJ-derived DGVMs have been applied to a variety of research questions, including simulations of the terrestrial carbon cycle [16], net primary productivity [13], biomass [17], ecohydrology [18], ecosystem services [6], and for both future and paleo time periods [19]. A number of studies using LPJ have focused on research questions pertaining to the carbon budget, describing potential future vegetation changes in terms of biomass or net primary productivity (e.g., [13]). However, many important ecological and biogeographical questions, such as those concerning species and habitat conservation, require information about how climate change may affect vegetation at the level of individual plant functional types (PFTs; e.g., trees, grass, shrubs) and species. Understanding potential future vegetation changes in these terms is important for addressing many conservation and natural resource management questions, such as the potential effects of climate change on threatened and endangered species or the persistence of key habitat types. Additionally, when simulating future changes in the distribution of vegetation, it is particularly important to use mechanistic models, such as LPJ, that explicitly represent vegetation responses to changes in atmospheric CO<sub>2</sub> concentrations [11]. Changes in CO<sub>2</sub> concentrations may affect leaf area, water use efficiency, and vegetation structure, which in turn may alter competitive interactions among species and PFTs, such as trees, grass, and shrubs that form the mosaic of forest, woodland, savanna, grassland, steppe, and shrubland in many topographically complex arid regions, including parts of our study area [20,21].

The aim of this study was to simulate vegetation responses to climate change at a fine spatial resolution across our topographically complex study area that includes vegetation ranging from xeric vegetation in the interior western United States to mesic vegetation along the Pacific Coast. LPJ was able to accurately simulate historical vegetation for many parts of the study area when compared with both potential natural vegetation data for the United States and remotely sensed land cover data, providing confidence in the model's ability to simulate vegetation at fine spatial resolutions in topographically complex regions. The simulated future vegetation changes displayed fine spatial-scale patterns of contraction, expansion, and persistence of vegetation, all mediated by the region's topography. The results of this study improve our understanding of the potential magnitude and complexity of future vegetation changes that may

occur in mountainous regions, with the caveat that many uncertainties associated with both projections of future climates and potential vegetation responses to climate change have yet to be resolved.

## Materials and Methods

### Study area grid and elevation data

The study area consists of a 30-second (0.008333-degree) grid covering a region of the north-west United States and southwest Canada from 38.0 to 58.0°N latitude and from 136.6 to 103.0°W longitude (~552,783,000 ha; Fig 1). We used 30-second elevation data from the Shuttle Radar Topography Mission version 2 (SRTM V2) data set (<http://www2.jpl.nasa.gov/srtm/>; [22]). For each point in our study area grid we assigned the elevation from the SRTM V2 grid cell in which our study area grid point was located.

### Soil data

For each 30-second grid point, we assigned soil data (sand [%], clay [%], soil layer thickness [mm]) from the Global Soil Data Task [23] 5-minute grid cell in which the 30-second grid point was located. This soil data set contained eight soil layers (50 mm, 50 mm, 100 mm, 100 mm, 100 mm, 200 mm, 200 mm, and 200 mm thick) representing the top meter of the soil profile. Additional soil variables (wilting point [mm], available water holding capacity [mm], and saturation [mm]) were derived for each soil layer using equations from Saxton *et al.* [24]. Although the Global Soil Data Task 5-minute soil data are spatially coarser than some soil data that are available for the United States (e.g., CONUS-Soil [25]), the 5-minute data have the advantage of providing data coverage for both the United States and Canada allowing simulated vegetation for these two areas to be directly comparable. Estimated fraction of plant roots in each soil layer was calculated using data from Jackson *et al.* [26].

### Historical climate data

LPJ requires time series of monthly climate data to simulate vegetation. To create the time-series data, we used three gridded climate data sets produced by the Climatic Research Unit (CRU), University of East Anglia (<http://www.cru.uea.ac.uk/cru/data/hrg/>), CRU CL 1.0 [27], CRU CL 2.0 [28], and CRU TS 2.1 [29], to develop regridded historical and future climate data for the study area. Local topographic (as opposed to adiabatic) lapse rates were calculated for monthly mean temperature (°C), total precipitation (mm), and mean possible sunshine (%) from the CRU CL 2.0 data set for 1961–1990 (30-year mean) using a moving-window local regression method. The values for each climate variable were interpolated to the 30-second study area grid using geographic-distance-weighted bilinear interpolation with the local lapse rates used to elevationally adjust the values of each climate variable to the elevation of each 30-second grid point except for grid points coincident with CRU CL 2.0 grid points, which were assigned the CRU CL 2.0 grid point values.

Monthly anomalies for 1901–2000 were calculated for CRU TS 2.1 temperature, precipitation and cloud data using a 1961–1990 (30-year mean) base period (also calculated from the CRU TS 2.1 data). Sunshine values were estimated from cloud cover data using methods described in Doorenbos and Pruitt [30] and Hulme *et al.* [31]. Temperature anomalies were calculated as differences (each monthly value minus the CRU TS 2.1 1961–1990 30-year mean value) and precipitation and sunshine anomalies were calculated as ratios (each monthly value divided by the CRU TS 2.1 1961–1990 30-year mean value). These anomalies (on the CRU TS 2.1 30-minute grid) were interpolated to the 30-second study area grid using geographic-distance-weighted



bilinear interpolation. The 30-second interpolated anomalies for each variable were applied to the corresponding regrided CRU CL 2.0 1961–1990 (30-year mean) variable for each 30-second study area grid point to create monthly time series. In the application of anomalies, monthly sunshine data were constrained to fall within the range of 0–100%.

## Future climate data

We created downscaled projections of future climate (2001–2099) using simulations from the World Climate Research Programme's (WCRP's) Coupled Model Intercomparison Project phase 3 (CMIP3) multi-model dataset ([http://www-pcmdi.llnl.gov/ipcc/about\\_ipcc.php](http://www-pcmdi.llnl.gov/ipcc/about_ipcc.php)). We used model output from the CMIP3 (Intergovernmental Panel on Climate Change (IPCC) Fourth Assessment Report) family of climate simulations to allow comparisons with existing work on projected vegetation change. We chose simulations from five AOGCMs: CCSM3 [32], CGCM3.1(T47) [33], GISS-ER [34], MIROC3.2(medres) [35], and UKMO-HadCM3 [36]. These model simulations were selected because they represented the range of CMIP3 projected temperature changes and included future projections of both increased and decreased precipitation for our study area [37,38]. Each of these models had simulations produced under the IPCC Special Report on Emissions Scenarios (SRES) A2 greenhouse gases emissions scenario [39], which produces temperature increases for 2070–2099 that overlap those produced by the more recent CMIP phase 5 (CMIP5) RCP 8.5 scenario [40]. Simulations from the CMIP5 archive (IPCC Fifth Assessment Report (AR5)) differ little from those in the earlier collection (IPCC AR5 Working Group 1 Technical Summary, Box TS.6 [38]). All five AOGCMs simulated seasonal future temperature increases across the study area for 2070–2099 (Table 1). There was less agreement among the AOGCM simulations as to seasonal precipitation changes for 2070–2099. For December-February, March-May, and September-November, all five AOGCMs simulated future precipitation increases for the study area. For June-August, GISS-ER, MIROC3.2(medres), and UKMO-HadCM3 simulated mean precipitation decreases and CCSM3 and CGCM3.1(T47) simulated small mean precipitation increases for the study area (Table 1). As the standard deviations in Table 1 indicate, all the simulations projected decreases in June-August precipitation for parts of the study area.

We downscaled the AOGCM future climate simulations to the 30-second study area grid by calculating anomalies of monthly temperature (°C), precipitation (mm), and cloud cover (percent) on the AOGCM grid using each future simulation's corresponding 20<sup>th</sup> century climate simulation (identified in the CMIP3 documentation at [http://www-pcmdi.llnl.gov/ipcc/about\\_ipcc.php](http://www-pcmdi.llnl.gov/ipcc/about_ipcc.php)) to create a 1961–1990 30-year mean base period. Temperature anomalies were calculated as differences (AOGCM future monthly temperature values for each month minus the AOGCM 20<sup>th</sup> century 1961–1990 30-year mean temperature for the same month). Precipitation and cloud cover anomalies were calculated as ratios (AOGCM future monthly precipitation or cloud cover values divided by the AOGCM 20<sup>th</sup> century 1961–1990 30-year mean precipitation or cloud cover values for the corresponding month). The anomalies were interpolated to the 30-second study area grid using geographic-distance-weighted bilinear interpolation. The interpolated anomalies were applied to the regrided CRU CL 2.0 1961–1990 30-year mean temperature and precipitation data and CRU CL 1.0 1961–1990 30-year mean cloud cover data to create time series of future monthly climate values [41]. The cloud cover (%) monthly values were subtracted from 100 to calculate possible sunshine (%) values.

## Vegetation simulations

Vegetation was simulated with LPJ [12], modified to use the Global Soil Data Task [23] multi-layer soil data set. Each vegetation simulation was run using a spin-up period of 800 years that

**Table 1. Mean ( $\pm$ SD) seasonal changes for 2070–2099 (30-year mean) relative to 1961–1990 (30-year mean) for the study area as simulated by five coupled atmosphere-ocean general circulation models (AOGCMs) under the A2 greenhouse gases emissions scenario.**

| AOGCM            | Mean Temperature ( $^{\circ}$ C) |           |           |           | Total Precipitation (%) |             |              |             |
|------------------|----------------------------------|-----------|-----------|-----------|-------------------------|-------------|--------------|-------------|
|                  | Dec-Feb                          | Mar-May   | Jun-Aug   | Sep-Nov   | Dec-Feb                 | Mar-May     | Jun-Aug      | Sep-Nov     |
| CCSM3            | 5.1 (1.2)                        | 4.2 (0.5) | 5.5 (1.0) | 4.5 (0.6) | 9.4 (11.3)              | 13.8 (16.7) | 0.6 (32.6)   | 6.0 (13.9)  |
| CGCM3.1(T47)     | 4.8 (0.7)                        | 3.6 (0.4) | 4.3 (0.6) | 3.5 (0.3) | 27.5 (7.4)              | 24.7 (18.7) | 3.8 (11.6)   | 18.6 (10.1) |
| GISS-ER          | 1.7 (0.4)                        | 1.6 (0.7) | 4.0 (1.0) | 2.5 (0.6) | 5.1 (6.0)               | 7.1 (14.8)  | -17.4 (16.1) | 20.0 (14.1) |
| MIROC3.2(medres) | 5.3 (1.0)                        | 5.0 (1.3) | 5.9 (0.9) | 5.2 (0.7) | 20.2 (17.3)             | 8.5 (14.3)  | -17.0 (14.3) | 8.3 (14.4)  |
| UKMO-HadCM3      | 3.1 (0.8)                        | 3.3 (0.6) | 6.1 (1.1) | 4.8 (0.6) | 26.0 (16.7)             | 6.7 (15.5)  | -2.5 (26.2)  | 11.4 (17.0) |

AOGCMs: CCSM3 [32], CGCM3.1(T47) [33], GISS-ER [34], MIROC3.2(medres) [35], UKMO-HadCM3 [36]

doi:10.1371/journal.pone.0138759.t001

consisted of repeated sets of 1901–1930 monthly temperature, precipitation and sunshine data. These spin-up data were detrended by applying locally weighted regressions [42] to estimate and subtract long-term trend values from the data (see Prentice *et al.* [43]). The spin-up period was followed by simulations using the historical (1901–2000) and projected future (2001–2099) climate data. Global mean annual atmospheric CO<sub>2</sub> concentrations for the 21<sup>st</sup> century were obtained from the Integrated Science Assessment Model (ISAM) reference case simulations for the A2 emissions scenario with 2070–2099 (30-year mean) atmospheric CO<sub>2</sub> concentrations of 734 ppm [44]. LPJ was run using open multi-processing (OpenMP) commands (<http://openmp.org>) to parallelize the code for workstations with dual 6-core processors. Run times for individual simulations were on the order of hours to days depending on the simulation being run and equipment being used. Input and output files combined were approximately 1 TB in size for each simulation and the number of data reads and writes required for each simulation contributed to run time lengths.

LPJ simulated a set of 10 PFTs (Table 2). PFT names and parameter values followed those of Sitch *et al.* [12]. PFT bioclimatic limits also followed Sitch *et al.* [12] with the exceptions listed in Table 2. The simulated PFTs were classified into 11 biome types using a combination of simulated PFT mean foliage projective cover (FPC; proportion of grid cell) and PFT mean height (m) as displayed in Fig 2. This method was modified from Prentice *et al.* [19]. A 30-year mean GDD5 value  $\leq 350$  degree days was used to identify alpine vegetation [19]. The savanna/grassland/steppe biome was defined as having a total tree PFT FPC  $\leq 0.30$ . Thonicke *et al.* [45] evaluated the fire model used in LPJ and found that simulated fire return intervals were longer than observed fire return intervals for the grassland regions of central North America. Based on results described in Thonicke *et al.* [45], we used an LPJ-simulated fire return interval of 63 years in the biome assignment process to distinguish between open forest/woodland and savanna/grassland/steppe biomes (Fig 2, [46]). The LPJ-simulated fire return interval did not include the effects of direct anthropogenic fire ignition or suppression. We also did not impose anthropogenic land cover changes (e.g., agriculture, urbanization, logging) in our vegetation simulations.

## Evaluation of simulated vegetation

We compared the LPJ simulated 1901–1930 (30-year mean) vegetation with potential natural vegetation data for the United States [49,50]. The 28 Küchler vegetation forms and the LPJ simulated biomes were reclassified into forest, grass, and shrub categories (Fig 3; S1 Appendix). Since the Küchler [49,50] data set did not extend into Canada, we also evaluated the LPJ simulated vegetation with 1-km land cover data for North America derived from April 1992 to

**Table 2. LPJ plant functional type life form and bioclimatic limits.**

| Plant Functional Type           | T <sub>c</sub> <sub>min</sub> (°C) | T <sub>c</sub> <sub>max</sub> (°C) | GDD5 <sub>min</sub> (deg. days) | (Tw-T <sub>c</sub> ) <sub>min</sub> (°C) |
|---------------------------------|------------------------------------|------------------------------------|---------------------------------|------------------------------------------|
| Tropical broadleaf evergreen    | 15.5                               | —                                  | —                               | —                                        |
| Tropical broadleaf raingreen    | 15.5                               | —                                  | —                               | —                                        |
| Temperate needleleaf evergreen  | -19.0 (-2.0)                       | — (22.0)                           | 900                             | —                                        |
| Temperate broadleaf evergreen   | -1.0 (3.0)                         | 18.8                               | 1200                            | —                                        |
| Temperate broadleaf summergreen | -17.0                              | 15.5                               | 1200                            | —                                        |
| Boreal needleleaf evergreen     | -32.5                              | 0.0 (-2.0)                         | 600                             | —                                        |
| Boreal needleleaf summergreen   | —                                  | -2.0                               | 350                             | 43                                       |
| Boreal broadleaf summergreen    | —                                  | -2.0                               | 350                             | —                                        |
| Temperate herbaceous (C3)       | —                                  | 15.5                               | —                               | —                                        |
| Tropical herbaceous (C4)        | —                                  | —                                  | —                               | —                                        |

Plant functional type bioclimatic limits: T<sub>c</sub><sub>min</sub> = mean temperature of the coldest month minimum limit; T<sub>c</sub><sub>max</sub> = mean temperature of the coldest month maximum limit; (Tw-T<sub>c</sub>)<sub>min</sub> = mean temperature of the warmest month minus mean temperature of the coldest month minimum limit; GDD5<sub>min</sub> = growing degree days on a 5°C base minimum limit. The bioclimatic limits match those of Sitch *et al.* [12] except for those modified limits, for which the original values from Sitch *et al.* [12] are given in parentheses. Limits were modified based on regional species distributions and climate information from Thompson *et al.* [47,48]. All PFTs have a woody life form with the exception of the two herbaceous PFTs. Herbaceous, as used here, refers to vegetation with non-woody stems and includes grass.

doi:10.1371/journal.pone.0138759.t002

March 1993 Advanced Very High Resolution Radiometer (AVHRR) remotely sensed data [51]. The AVHRR-derived land cover types were reclassified into forest, grass, and shrub categories and compared with the LPJ simulated 1964–1993 (30-year mean) biomes, which were also reclassified into forest, grass, and shrub categories (Fig 3; S1 Appendix). We compared the reclassified simulated vegetation data for each grid cell with the reclassified observed Küchler or AVHRR remotely sensed vegetation for the same grid cell to calculate percent agreement for forest, grass, and shrub vegetation across the study area (Tables 3 and 4). Potential natural vegetation and land cover types not simulated by LPJ (e.g., agriculture, urban areas, wetlands) were excluded from the evaluation (S1 Appendix).

## Results

### Simulated historical vegetation

The broad-scale spatial patterns of the simulated vegetation are visually quite similar to the observed vegetation data (Fig 3). Compared with Küchler's [49,50] potential natural vegetation data for the United States, LPJ correctly simulates the vegetation at 69% of the grid points, including 69% of the forest grid points, 63% of the grass grid points, and 73% of the shrub grid points (Table 3). Compared with North America AVHRR remotely sensed land cover data [51] for the entire study area, LPJ correctly simulates the vegetation at 75% of the grid points, including 93% of the forest grid points, with lower agreement for the grass (46%) and shrub (50%) grid points (Table 4). For both the potential natural vegetation and land cover comparisons, observed grass and herbaceous biomes are the least well simulated by LPJ (Tables 3 and 4, S1 Appendix).

Significant areas of disagreement between observed and simulated vegetation occur in eastern Montana and southern Alberta and Saskatchewan, where LPJ simulates forest and woodland in areas classified as grass-dominated by both the Küchler [49,50] and land cover [51] data sets (Fig 3). There are also large areas where LPJ simulates savanna/grassland/steppe vegetation and the observed vegetation data sets record shrub vegetation. These areas primarily occur in central Wyoming, southeastern Idaho, and in eastern Oregon (Fig 3). The opposite

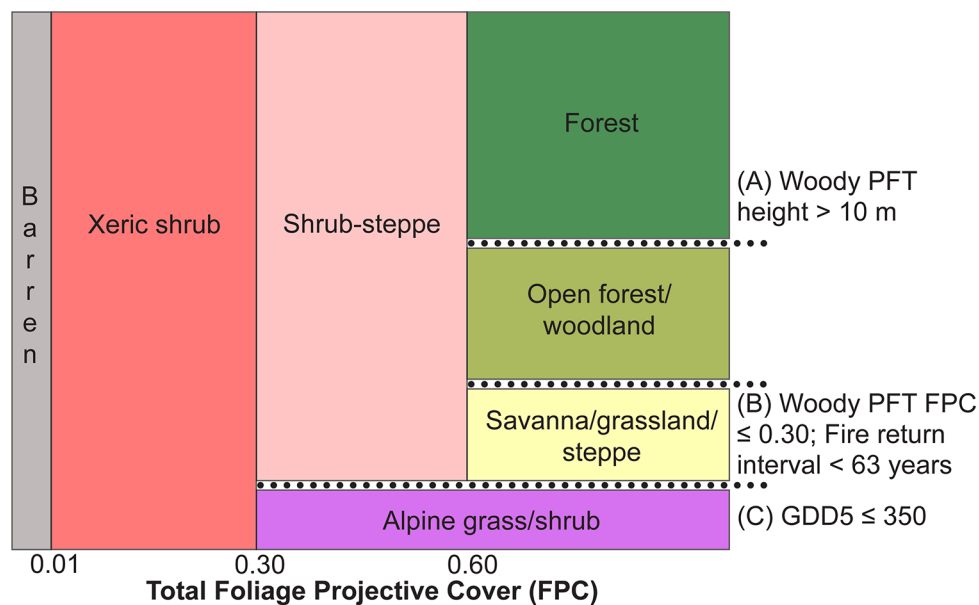

| Plant functional types                                            | Forest               | Open forest/woodland                                   |
|-------------------------------------------------------------------|----------------------|--------------------------------------------------------|
| Temperate broadleaf evergreen present                             | Maritime cool forest | Cool open forest/woodland with broadleaf evergreen PFT |
| Temperate needleleaf evergreen or temperate broadleaf summergreen | Cool forest          | Cool open forest/woodland                              |
| Boreal needleleaf evergreen or boreal broadleaf summergreen       | Cold forest          | Cold open forest/woodland                              |

**Fig 2. Biome assignment scheme for LPJ simulated vegetation.** (A) Simulated woody plant functional type (PFT) height (m) is used to distinguish forest (>10 m) from open forest/woodland (≤10 m). (B) Savanna/grassland/steppe is assigned when woody PFT foliar projective cover (FPC) is ≤0.30 and the fire return interval is <63 years. (C) Alpine grass/shrub is assigned when annual growing degree days (5°C base; GDD5) are ≤350 (Table 2).

doi:10.1371/journal.pone.0138759.g002

pattern occurs along the northern and eastern edge of the Columbia Plateau, where the Küchler [49] potential natural vegetation data record grassland and LPJ simulates shrub-steppe. LPJ underestimates forest along the east slope of the Cascade Range and Sierra Nevada mountain ranges, the northeast edge of the Columbia Plateau, and for mountain ranges in the Great Basin of Nevada and Utah. Inspection of the locations and nature of the disagreements suggests that they are in part the result of the relatively coarse spatial resolution of the soil data, and the necessarily low taxonomic resolution of the reclassified vegetation data (both simulated and observed; S1 Appendix). However, these disagreements do not seriously limit the interpretability of the results.

## Simulated future vegetation

Under all five future climate projections, LPJ simulates substantial changes in vegetation across the study area (Fig 4, Table 5). At high elevations, cold forest, cold open forest/woodland, and



## Potential Natural Vegetation

## Land Cover, April 1992-March 1993

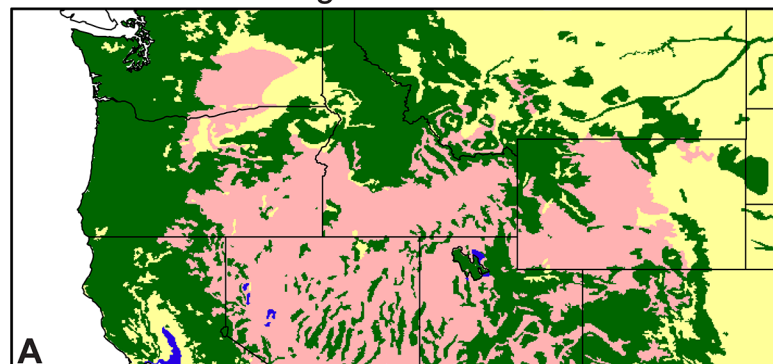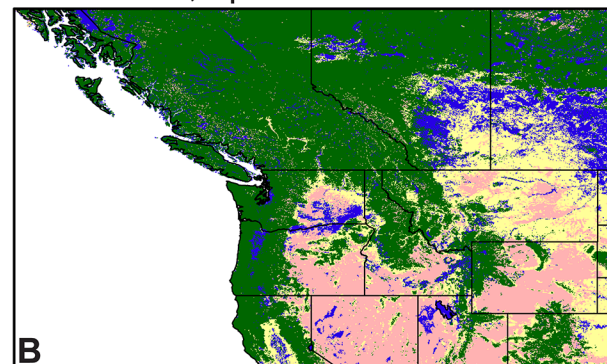

## LPJ, 1901-1930

## LPJ, 1964-1993

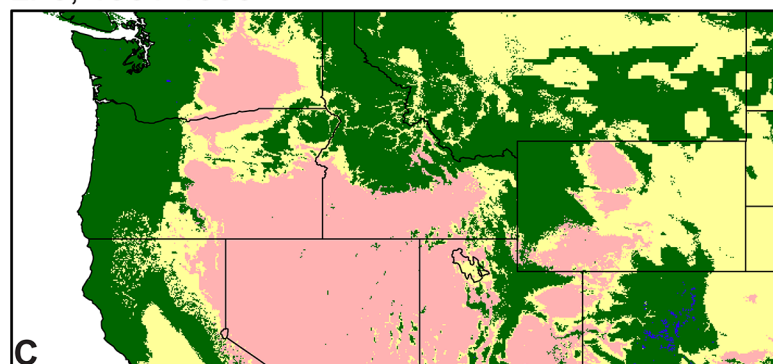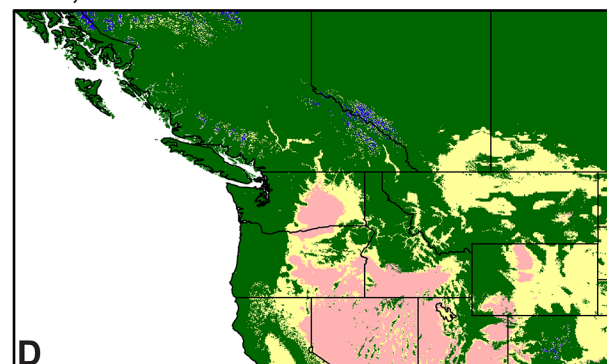

Forest Grass Shrub Excluded from analysis

## Potential Natural Vegetation - LPJ Disagreement

## Land Cover - LPJ Disagreement

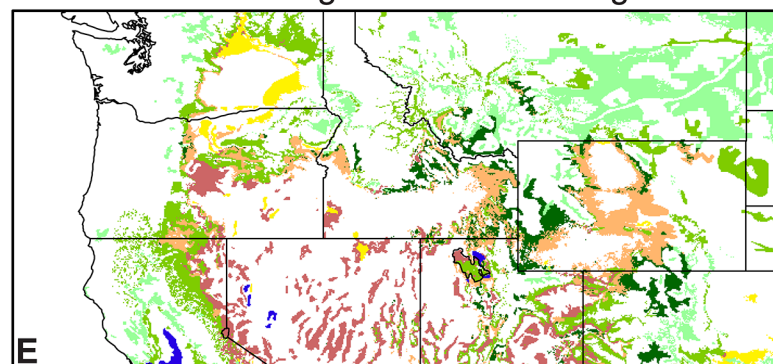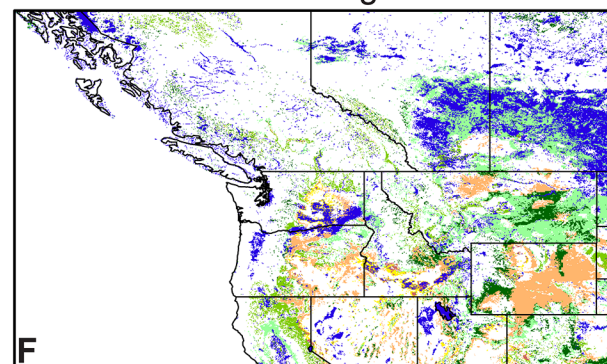

## Observed Vegetation - LPJ Simulated Vegetation

Forest-Grass Grass-Forest Shrub-Forest Excluded from analysis  
Forest-Shrub Grass-Shrub Shrub-Grass

**Fig 3. Evaluation of LPJ simulations.** Evaluation was done using (A) Küchler [49,50] potential natural vegetation (PNV) data and (B) Advanced Very High Resolution Radiometer (AVHRR) land cover data from April 1992 to March 1993 [51]. Both data sets were reclassified into forest, grass, and shrub categories. Data excluded from analyses included PNV and land cover vegetation types not simulated by LPJ (e.g., agriculture, urban areas, wetlands). The PNV data were compared with (C) 1901–1930 [29] LPJ simulations and the land cover data were compared with (D) 1964–1993 [29] LPJ simulations, with (E, F) areas of disagreement displayed for each comparison. The legend indicates the type of disagreement. For example, the Forest-Grass category indicates areas where the (E) PNV or (F) land cover data recorded forest vegetation but LPJ simulated grass vegetation.

doi:10.1371/journal.pone.0138759.g003

**Table 3. Percent agreement of LPJ simulated vegetation with Küchler [49,50] potential natural vegetation (PNV) form.**

| Küchler PNV Form | LPJ Biomes, 1901–1930 (30-year mean) |           |           |
|------------------|--------------------------------------|-----------|-----------|
|                  | Forest (%)                           | Grass (%) | Shrub (%) |
| Forest           | 69                                   | 19        | 11        |
| Grass            | 30                                   | 63        | 5         |
| Shrub            | 10                                   | 16        | 73        |

All data were classified into forest, grass, and shrub categories (see [S1 Appendix](#)).

doi:10.1371/journal.pone.0138759.t003

alpine grass/shrub areas decrease or disappear and are replaced by cool forest and cool open forest/woodland, particularly at lower latitudes. This trend is particularly apparent in the Cascade Range and the Rocky Mountains in the United States. The southern boundary of cold forest in Canada is simulated to shift northward and is replaced by cool forest and cool open forest/woodland. Under all five future climate simulations, cold open forest/woodland is simulated to expand from 6.2% of the study area to 6.3–10.5%, particularly in British Columbia ([Table 5](#)). Under historical climate conditions, the interior parts of the study area were dominated by savanna/grassland/steppe, shrub-steppe, and xeric shrub vegetation [49]. Under simulated future climate conditions, large areas of shrub-steppe and xeric shrub vegetation are replaced by savanna/grassland/steppe vegetation. This replacement occurs throughout the interior Great Basin and Columbia Plateau with areas of shrub-steppe vegetation simulated to decrease in the study area from 10.5% to 0.6–2.4% by 2070–2099 ([Table 5](#)).

In addition to the vegetation changes described above, there are also regions of the study area where the historical vegetation is simulated to persist under future climate conditions for 2070–2099 ([Fig 4](#)). Cold forest in parts of northern Alberta and Saskatchewan is simulated to remain unchanged. Large areas of simulated maritime cool forest along the coast of British Columbia, Washington, and Oregon, as well as at lower elevations in the Cascade Range, remain in the future simulations. Cool open forest/woodland with a broadleaf evergreen PFT component is also simulated to remain in parts of western Oregon and northern California. Overall, forest and woodland vegetation is simulated to increase from 69.4% in the 1961–1990 simulation to 75.5–89.7% under the five future 2070–2099 simulations ([Table 5](#)). Additionally, large areas of savanna/grassland/steppe vegetation in the northern part of the Sacramento Valley in California are simulated to persist under all five future climate simulations.

## Discussion

This study describes the application of LPJ at a 30-second spatial resolution for a large region of western North America. The results represent an advance over previous LPJ simulations for

**Table 4. Percent agreement of LPJ simulated vegetation with Advanced Very High Resolution Radiometer (AVHRR) remotely sensed land cover data [51].**

| AVHRR Land Cover | LPJ Biomes, 1964–1993 (30-year mean) |           |           |
|------------------|--------------------------------------|-----------|-----------|
|                  | Forest (%)                           | Grass (%) | Shrub (%) |
| Forest           | 93                                   | 5         | 1         |
| Grass            | 48                                   | 46        | 5         |
| Shrub            | 19                                   | 30        | 50        |

All data were classified into forest, grass, and shrub categories (see [S1 Appendix](#)).

doi:10.1371/journal.pone.0138759.t004



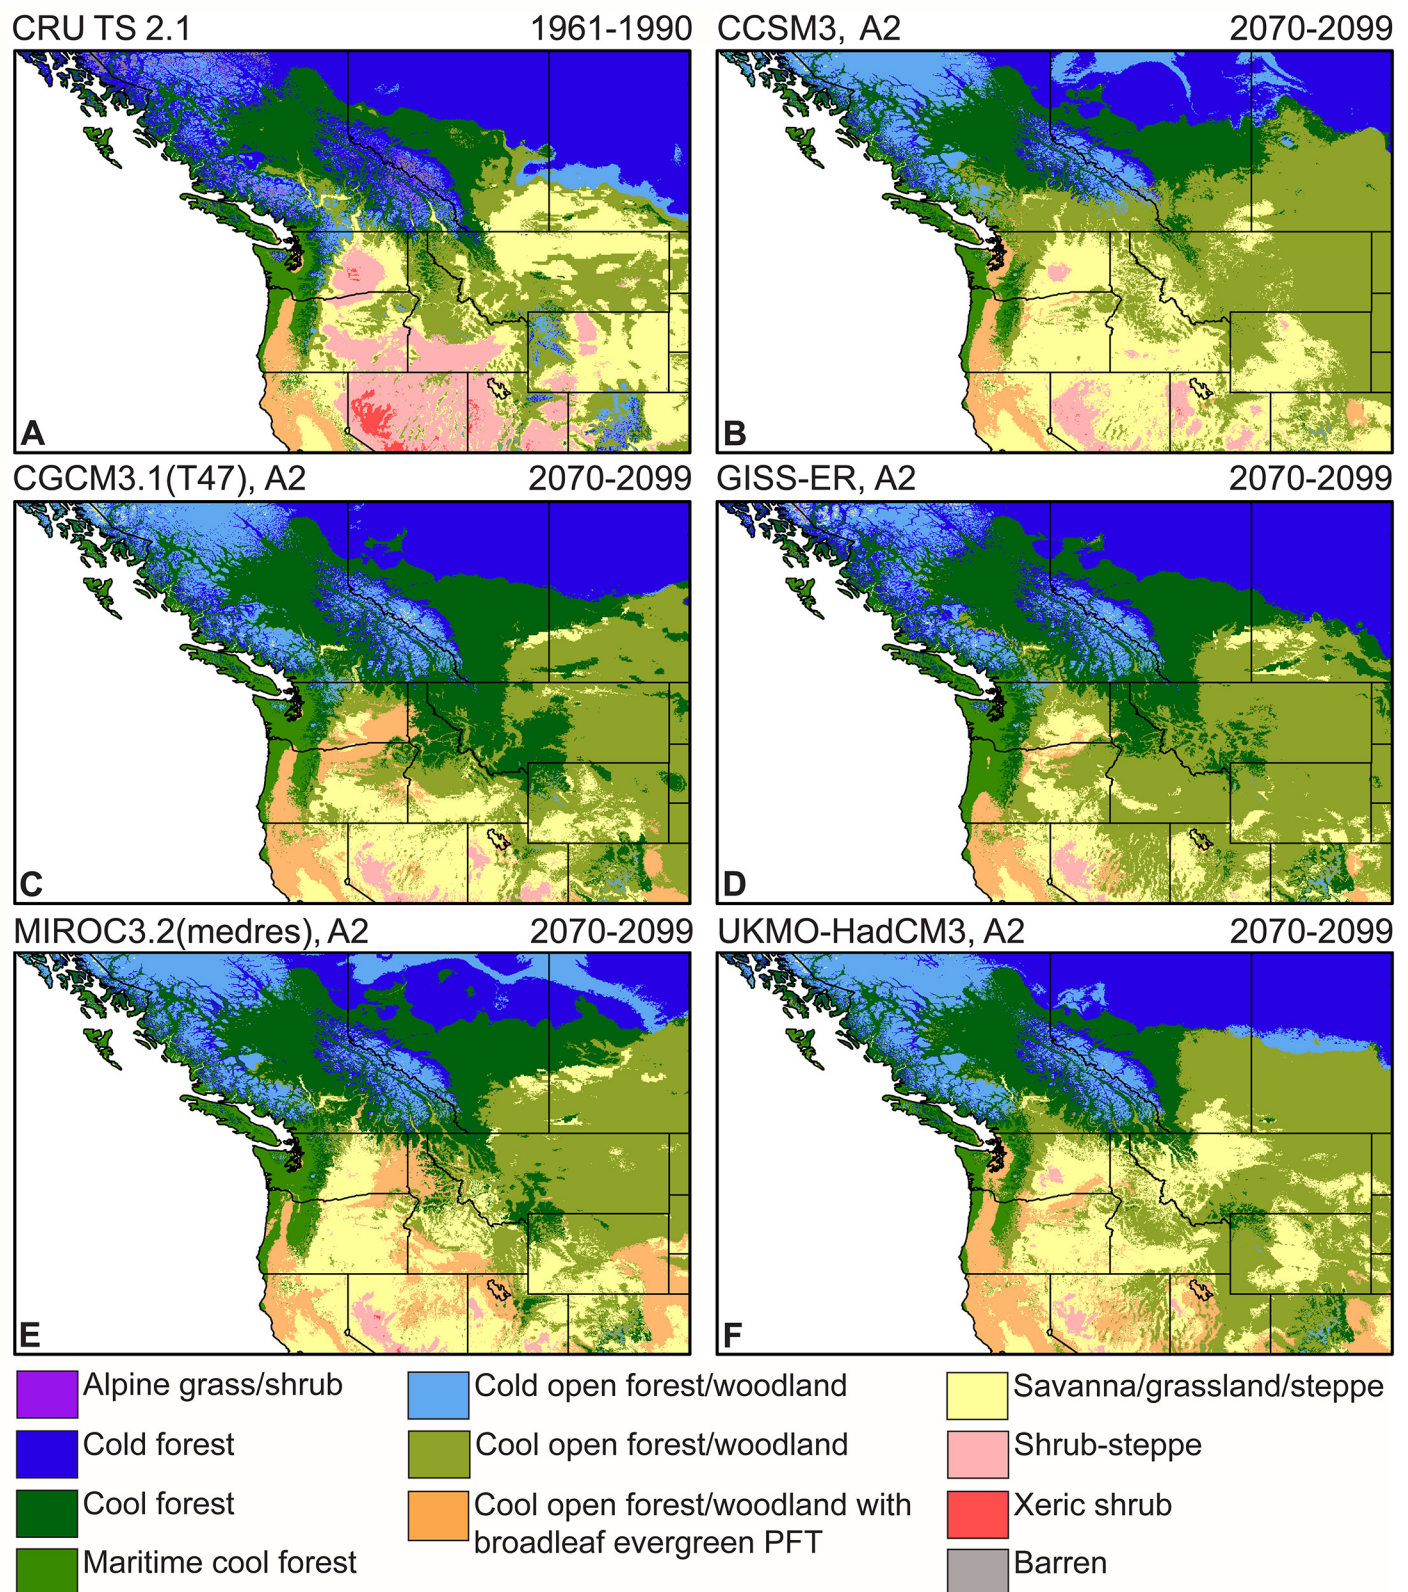

**Fig 4. LPJ simulated vegetation.** Vegetation was simulated for (A) 1961–1990 using CRU TS 2.1 climate data [29] and for (B–F) 2070–2099 using climate projections from CCSM3 [32], CGCM3.1(T47) [33], GISS-ER [34], MIROC3.2(medres) [35], and UKMO-HadCM3 [36] coupled atmosphere-ocean general circulation models (AOGCMs). PFT = plant functional type.

doi:10.1371/journal.pone.0138759.g004

**Table 5. Simulated biomes (% of study area grid cells) for 1961–1990 and 2070–2099 (bold text indicates biomes that are simulated to increase under projected future climates).**

| Biome                                                                    | 1961–1990 (%) | 2070–2099 (%) |               |             |                   |             |
|--------------------------------------------------------------------------|---------------|---------------|---------------|-------------|-------------------|-------------|
|                                                                          | CRU TS 2.1    | CCSM3         | CGCM3.1 (T47) | GISS-ER     | MIROC3.2 (medres) | UKMO-HadCM3 |
| Alpine grass/shrub                                                       | 0.6           | <0.1          | <0.1          | <0.1        | <0.1              | <0.1        |
| Cold forest                                                              | 25.7          | 13.4          | 18.2          | 21.5        | 12.3              | 16.5        |
| Cool forest                                                              | 14.6          | 14.5          | <b>25.0</b>   | <b>22.6</b> | <b>21.2</b>       | <b>15.1</b> |
| Maritime cool forest                                                     | 3.1           | <b>3.8</b>    | <b>4.6</b>    | <b>4.3</b>  | <b>4.9</b>        | 2.7         |
| Cold open forest/woodland                                                | 6.2           | <b>9.3</b>    | <b>8.2</b>    | <b>6.3</b>  | <b>10.5</b>       | <b>9.9</b>  |
| Cool open forest/woodland                                                | 17.3          | <b>31.2</b>   | <b>24.1</b>   | <b>31.8</b> | <b>23.0</b>       | <b>29.5</b> |
| Cool open forest/woodland with broadleaf evergreen plant functional type | 2.5           | <b>3.3</b>    | <b>5.8</b>    | <b>3.2</b>  | <b>8.9</b>        | <b>8.3</b>  |
| Savanna/grassland/steppe                                                 | 18.1          | <b>21.9</b>   | 12.6          | 9.6         | <b>18.2</b>       | 17.3        |
| Shrub-steppe                                                             | 10.5          | 2.4           | 1.3           | 0.6         | 1.1               | 0.6         |
| Xeric shrub                                                              | 0.7           | <0.1          | <0.1          | <0.1        | <0.1              | 0           |
| Barren                                                                   | 0.6           | <0.1          | <0.1          | <0.1        | 0                 | <0.1        |

doi:10.1371/journal.pone.0138759.t005

this region because they resolve fine-scale patterns of vegetation change that are not visible when the model is run at coarser spatial resolutions. Resolving these fine-scale vegetation patterns is particularly important for understanding the dynamics of future vegetation changes in regions of complex topography, such as our study area. The results of our evaluation support the use of LPJ at similar spatial resolutions for other regions of the globe.

### LPJ simulations of historical vegetation

LPJ does a good job of simulating the broad-scale patterns of forest, grass, and shrub vegetation across the study area (Fig 3; Tables 3 and 4). The simulated historical vegetation patterns are generally similar to those produced by other vegetation models for parts of the region at similar spatial resolutions (e.g., Rogers *et al.* [52]). The 30-second grid is able to resolve a number of fine scale vegetation patterns that are not visible at coarser spatial resolutions. Valley bottom vegetation is distinguishable in a number of areas, such as along the Salmon River in Idaho (Fig 5A). Also visible are vegetation transitions over elevation gradients in mountainous regions, such as along the slopes of Mount Rainier, Washington, where vegetation is simulated as transitioning along elevational gradients from cool forest, cold forest, and cold open forest/woodland to alpine vegetation above tree line at high elevations (Fig 5B). These transitions along elevation gradients generally match historical vegetation transitions in the region [53].

In some areas, the LPJ-simulated vegetation improves on previous DGVM simulations. For example, studies using DGVMs [52,54] have had difficulty resolving the mix of forest, woodland, and wetland prairie vegetation that historically was present throughout the Willamette Valley in Oregon [55]. LPJ, as implemented here, simulates open forest/woodland with a broadleaf evergreen PFT for the Willamette Valley (Figs 4A and 5C), which represents a relatively good match with the valley's potential natural vegetation [49]. Although not the dominant vegetation, a number of broadleaved evergreen species are noted in the 1850s United States General Land Office surveys as being present in the Willamette Valley, including Pacific madrone (*Arbutus menziesii*) and manzanita (*Arctostaphylos* spp.) [55]. LPJ simulates this same open forest woodland with broadleaf evergreen PFT vegetation in the area around Puget Sound, Washington, and in the southeast part of Vancouver Island, British Columbia, where



Salmon River, Idaho  
CRU TS 2.1, 1961–1990

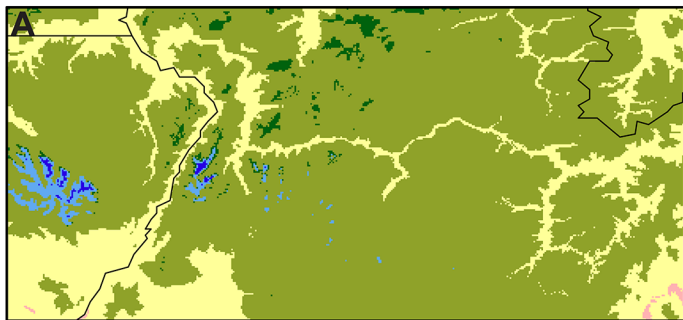

Mount Rainier, Washington  
CRU TS 2.1, 1961–1990

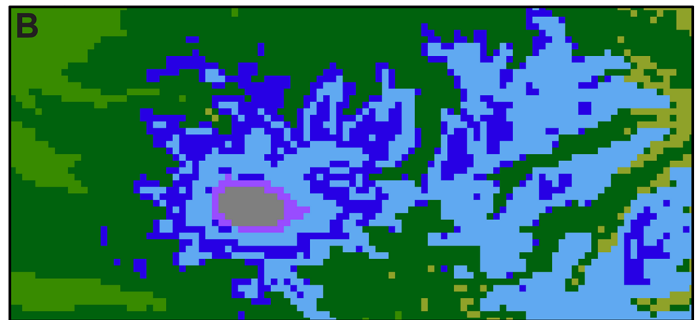

Willamette Valley, Oregon  
CRU TS 2.1, 1961–1990

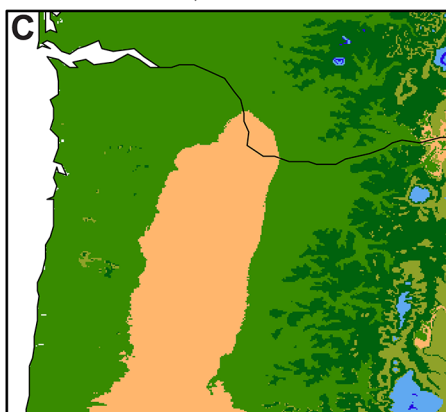

GISS-ER, 2070–2099

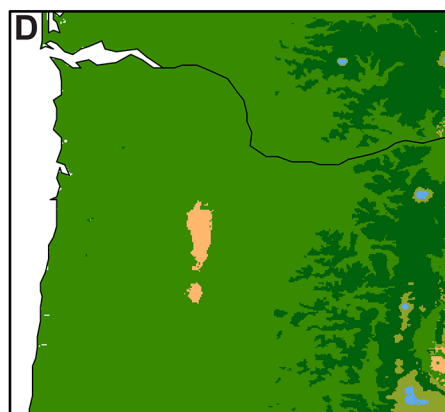

MIROC3.2, 2070–2099

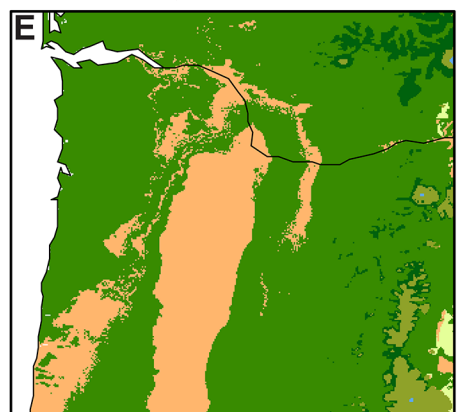

Coast Mountains, British Columbia  
CRU TS 2.1, 1961–1990

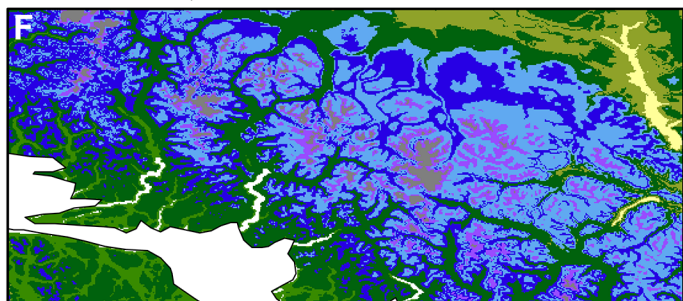

CCSM3, 2070–2099

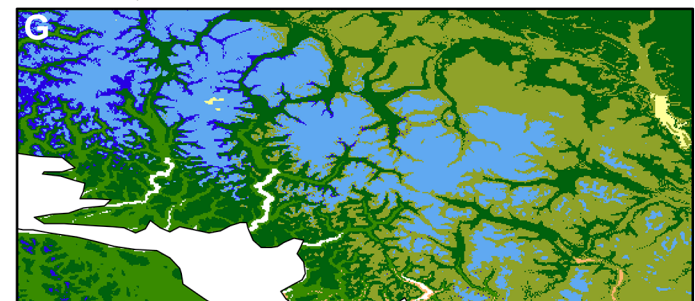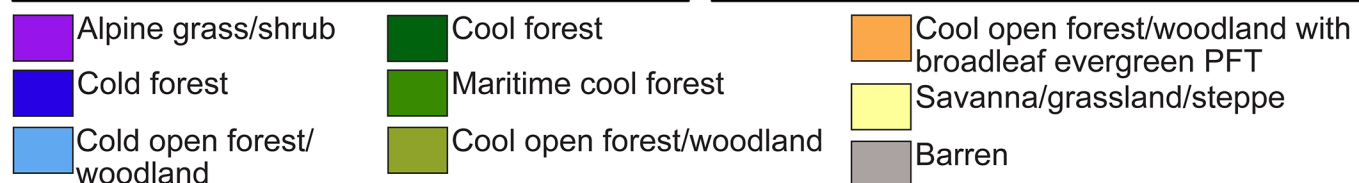

**Fig 5. Regional examples of LPJ simulated vegetation.** LPJ 1961–1990 [29] simulated vegetation for (A) the Salmon River region of Idaho and (B) Mount Rainier, Washington. (C) Willamette Valley, Oregon, historical (1961–1990 [29]) and projected future (2070–2099) vegetation as simulated by the (D) GISS-ER [34] and (E) MIROC3.2(medres) [35] coupled atmosphere-ocean general circulation models (AOGCMs). (F) Historical (1961–1990 [29]) and (G) simulated future (2070–2099, CCSM3 [32]) vegetation for the Canadian Coast Range. PFT = plant functional type.

doi:10.1371/journal.pone.0138759.g005

prairies and open woodlands, particularly oak woodlands, historically occurred [53]. This vegetation type also is simulated for parts of southern Oregon and northern California where it represents the more open forests and woodlands of this region, such as the broadleaf oak woodlands of northern California. Although fire ignition by Native Americans is often invoked as necessary for having maintained open vegetation in these regions prior to Euro-American settlement, anthropogenic ignitions are not simulated by LPJ. The simulated vegetation results imply that climate is sufficient for maintaining open vegetation, which is consistent with evidence from paleoenvironmental records that, regardless of the frequency of anthropogenic ignitions, climate played an important role in the maintenance of open vegetation in these regions [56].

Regions where LPJ-simulated vegetation does not match the observed vegetation occur primarily in the interior, more arid parts of the study area (Fig 3). In some cases, the simulated disagreement reflects the control exerted on vegetation by the soil data via soil moisture. For example, simulated cool open forest/woodland along the Missouri River in eastern Montana is overrepresented when compared with the Küchler [49] potential natural vegetation. In this case, the simulated vegetation follows the boundaries of the underlying soil type that occurs along the Missouri River in eastern Montana but over a larger area than the floodplain forest identified by Küchler [49], as can be seen by comparing Fig 3A and 3C. In other cases, the simulated disagreement may reflect limits in the ability of this version of LPJ to simulate fire. Fire is an important control on the distribution and dynamics of woodland, grass, and shrub vegetation across the study area. On the Columbia Plateau, low severity, high frequency fires historically occurred at lower elevations [57]. These types of fires are not well simulated by this version of LPJ [45] although recent work by Pfeiffer *et al.* [58] and Thonicke *et al.* [59] to improve LPJ simulation of fire may help to resolve these issues. Additionally, some of the disagreement between the simulated vegetation and the 1992–1993 land cover data [51] may reflect human activities that have affected vegetation. For example, areas where woodland and forest expansion has occurred on the landscape as a result of recent fire suppression and other human land-use activities would be recorded in the 1992–1993 remotely sensed land cover data but would not be simulated by LPJ [57].

Disagreement between simulated and observed vegetation also reflects the limitations of the 30-second grid's ability to represent vegetation variations that occur at scales below the resolution of an individual grid cell. For example, at high elevations there are many alpine and subalpine meadows that may be smaller than an individual 30-second grid cell and will not be resolved by our study area grid. Topography also can vary significantly over relatively short distances, with changes in aspect and slope affecting climate and hence vegetation patterns. Additionally, soils may exert strong controls on vegetation distributions but some fine-scale vegetation patterns may not be simulated by LPJ because particular soil types are not resolved by the 30-second grid.

## LPJ simulations of future vegetation changes

The simulated expansion of vegetation in 2070–2099 occurs not only poleward in latitude and upward in elevation, but in all directions, including southward and to lower elevations, illustrating the diversity of potential vegetation responses to climate changes in regions of topographic complexity, such as our study area (Fig 5). Under all five future climate projections, LPJ simulates the expansion of forest and woodland vegetation across large parts of the central and eastern regions of the study area. In general, this response is similar to a continuation of historical woodland and forest dynamics in the interior western United States. Examples include the expansion of western juniper (*Juniperus occidentalis*) woodland in eastern Oregon,

where climate changes as well as changes in disturbance regimes and land-use activities have played a role in woodland expansion [60]. Some of these factors, such as fire suppression, reduction in browser populations, and land-use changes, were not included in our vegetation simulations. Other factors, such as the physiological effects of changes in atmospheric CO<sub>2</sub> concentrations, are simulated by LPJ and may alter plant water-use efficiency and plant available water, affecting the competitive interactions between PFTs and contributing to the simulated future invasion of grassland and shrubland vegetation by trees [11,21,61]. Another example of the complex response of vegetation to climate change is the simulated future expansion of maritime cool forest into the Willamette Valley, which is most pronounced under the GISS-ER and MIROC3.2(medres) simulations (Fig 5D and 5E). This expansion also matches recent historical patterns of forest expansion in this region [55]. However, LPJ also simulates a different response, the potential future expansion of open forest and woodland vegetation in the Willamette Valley under the CCSM3 and UKMO-HadCM3 simulated climates (Fig 4). These different simulated vegetation responses may reflect important differences in the AOGCM-simulated climates and illustrate the need for additional research to evaluate the processes and thresholds involved in simulated vegetation changes for this region.

Under all five future climate simulations, high-elevation tree lines are simulated to move upwards resulting in the contraction of alpine grass/shrub vegetation, such as in the Canadian Coast Mountains (Fig 5F and 5G). Increasing elevation of tree lines is consistent with tree line responses observed in the paleoecological record during past periods of temperature change, although tree line response can be quite variable depending on location [62]. Other factors, ranging from fire suppression and grazing to soil water availability and nutrients, also may affect tree line response [62]. Site-specific factors, such as localized wet meadows or herbivore grazing, may limit tree establishment and help some open areas to persist as climate changes. Note that in the current LPJ simulations we have not excluded vegetation from areas that are currently covered by perennial ice and snow, such as parts of the Canadian Rocky Mountains. Areas classified as barren at high elevations are regions of low productivity resulting from the combination of climate and soil conditions at those locations. Future vegetation changes in these areas may be limited by the rate of soil development.

Another vegetation change simulated for 2070–2099 under all five future climate simulations is the reduction in the area of shrub-steppe and xeric shrub in the interior of the study area and its replacement by savanna/grassland/steppe or open forest/woodland vegetation. This simulated reduction in shrub-dominated vegetation may reflect, in part, the effects of increased atmospheric CO<sub>2</sub> concentrations on vegetation, which may increase plant water-use efficiency, allowing trees to expand into more arid parts of the study area occupied by shrubs [11,61]. This simulated vegetation change would have significant implications for many species in this region, such as Greater Sage-grouse (*Centrocercus urophasianus*), a species of conservation concern which relies on sagebrush (*Artemisia* spp.) shrub-steppe habitat.

## Comparison with other studies

Our simulated future vegetation changes are similar to those produced by other studies for the region, although direct comparisons are limited by differences in experimental protocol. Rogers *et al.* [52], using the MAPSS-CENTURY 1 (MC1) DGVM [63], simulated similar expansion of forest vegetation and reduction of shrubland for 2070–2099 in arid parts of eastern Oregon and Washington. They also used CMIP3 A2 future climate simulations at a 30-second spatial resolution, although other aspects of their experimental protocol differed from our study (e.g., different soil and historical climate data, a 1971–2000 historical climate base period) [52]. Their simulations produced forest in western Oregon and Washington that persisted under

projected future climate conditions in general agreement with our simulations, although our classification of forest types differed (Fig 4, Table 5). Hamann and Wang [64] used a statistical model to simulate future ecological zones and tree species distributions for British Columbia, using an IPCC IS92a future climate simulation [65]. They simulated a 97% decrease in alpine tundra for their study area for 2071–2100, which agrees with our simulated decrease in alpine grass/shrub (Fig 5F and 5G). They also simulated an expansion of more arid ecosystems (e.g., bunch grass, ponderosa pine) into central British Columbia, which differs from our simulated expansion of cool forest in this region. This difference could be the result of a number of factors, including the physiological response of vegetation to changes in atmospheric CO<sub>2</sub> concentrations, which is simulated by LPJ but not included in the statistical model results. Hamann and Wang [64] tested this possibility by increasing precipitation to approximate a CO<sub>2</sub>-driven change in water-use efficiency, which reduced the amount of arid ecosystem expansion and improved the agreement with our LPJ simulations.

### Uncertainties associated with interpreting vegetation simulations

There are a number of caveats that must be considered when interpreting these vegetation simulations. The simulated biome distributions provide important information about the potential dynamics and patterns of vegetation responses to climate change. These simulations should not, however, be interpreted as predictions of specific future changes that will occur at particular locations. There is still significant uncertainty regarding the rate, magnitude, and spatial expression of future climate change. As is clear from the biome simulations, different projections of future climate can result in significant differences in simulated vegetation patterns (Fig 4). We used five AOGCM simulations in this study but there are others that could be used. Giorgi [66] describes some of the uncertainties associated with model simulations of climate.

We have described relatively fine spatial resolution vegetation simulations that include significant topographic detail and help to characterize the potential spatial response of vegetation to future changes in climate and atmospheric CO<sub>2</sub> concentrations. These simulations include a number of processes that are important in determining how vegetation responds to climate change [12]. However, there are important processes that affect vegetation type and distribution that are not simulated by this version of LPJ or that are simulated in a simplified form. Decisions of what processes to include in numerical vegetation models are driven by a number of factors, including what research questions are being investigated, the numerical efficiency (and speed) with which a model runs, and the availability of input data necessary to simulate processes at different scales. Understanding these limitations is important for accurately interpreting the simulated vegetation. We have already mentioned some of the processes not included in our simulations, such as human activities resulting in land cover changes. Other important processes include the effects of insect and disease outbreaks that may affect vegetation distribution patterns over time. For example, the simulated persistence of forest in Canada (Fig 4) does not include the potential future effects of bark beetle outbreaks that have had significant impacts on forests in western North America [67]. LPJ also does not explicitly simulate plant dispersal but instead assumes that dispersal rates will be fast enough to accommodate vegetation responses to climate change. Whether this assumption is appropriate will depend on a number of factors, such as potential future land-use activities that may create dispersal barriers and the extent to which human-assisted species migration may occur. It is important to note that the various model limitations discussed here are not unique to LPJ [9], and the model continues to be developed, including efforts to improve simulation of plant hydraulic architecture [68], peatland and permafrost dynamics [69], and hydrology [70].



Although we simulated vegetation for grid points spaced 30-seconds (~1-km) apart, there is a significant amount of environmental variability in the study area that occurs at finer spatial resolutions. Topographic and climatic controls on vegetation, such as fine-scale variations in slope and aspect, may have significant effects on the type and distribution of vegetation at local scales, and these fine-scale variations were not resolved by our 30-second study area grid. Local hydrology and the presence of various water bodies (lakes, reservoirs, etc.) may produce distinct wetland, riparian, and aquatic vegetation at sub-grid cell resolutions, such as wet meadows. However, the version of LPJ we used does not simulate the effect of wetland hydrology on vegetation (e.g., inundation stress) and we excluded wetland and aquatic habitat from our study ([S1 Appendix](#)).

There are also limits to the temporal resolution of our analysis. Important climate variability occurs on sub-monthly temporal scales and this temporal variability can affect vegetation patterns. Of particular importance to vegetation will be the future frequency and duration of extreme climate events (e.g., heat waves, droughts). There are still limits in the ability of climate models to accurately simulate these extreme events [71] and they are not well represented in the monthly climate data we used as input for our vegetation simulations. However, LPJ does estimate the effects of extreme events on vegetation, such as cumulative heat stress or mortality from extreme low temperatures [12].

In addition to spatial and temporal resolution limitations, our model simulations have a limited taxonomic resolution. We simulated potential future vegetation change in terms of biomes as these simulations provide important information about potential future distributions of major habitat types. PFT parameters in LPJ may be chosen to represent individual species, although this is more commonly done with models that resolve stand-level population dynamics and resource competition (e.g., LPJ-GUESS [72]) and are better able to simulate species interactions, such as competition for light and water at different successional stages [73]. Uncertainties associated with a number of LPJ's parameters are described by Zaehle *et al.* [74].

## Implications for conservation and natural resource management

The potential vegetation changes simulated for 2070–2099 are quite large ([Fig 4](#)). The magnitude of these changes may present challenges for land managers attempting to develop adaptive management responses to climate change. Our results indicate that DGVMs, such as LPJ, can relatively accurately simulate historical vegetation patterns at a spatial resolution commensurate with many managed areas, such as national forests in the United States or whole systems areas used by The Nature Conservancy. This accuracy in simulating historical vegetation patterns lends confidence to the ability of the model to simulate future vegetation changes. By providing projections of future vegetation changes over a large region, fine spatial-scale simulations may also contribute to conservation and natural resource management being carried out at local scales. Biomes, as simulated here, provide information on potential future vegetation changes in terms of important habitat types (e.g., forest, grassland). These results complement model simulations of plant taxa responses to climate change (e.g., Hamann and Wang [64], Coops and Waring [75], Rehfeldt *et al.* [10]) and may be particularly relevant for conservation strategies focused on preserving ecosystem structure and function [76].

Land managers engaged in responding to climate change may want to translate simulated vegetation changes and their accompanying uncertainties into management actions. This effort may include combining simulated vegetation changes, such as the LPJ simulations presented here, with the expert knowledge of land managers concerning their local ecosystems and species of management concern, and many efforts are underway to guide managers in this process (e.g., Cross *et al.* [77]). Key results from our study that may contribute to these efforts include

the simulated persistence of forest biomes, particularly in the northern parts of the study area, accompanied by the expansion of cool biomes into areas previously occupied by cold biome types (Fig 4). This result indicates that certain areas may be able to maintain forest habitat under future climate conditions although the species composition of these habitats may change. Alpine vegetation is simulated to decrease throughout the study area, in agreement with other future vegetation change studies for this region (e.g., [52,64]). One of the largest vegetation changes identified in our study is the simulated expansion of woodland and forest into arid grassland and shrubland under projected future climate conditions. However, this simulated expansion of trees may reflect, in part, an underestimation of fire occurrence in our simulations for these regions, and these results may be improved by additional research.

## Supporting Information

**S1 Appendix. Classification of vegetation data into forest, grass, and shrub categories.** (PDF)

## Acknowledgments

We acknowledge the modeling groups, the Program for Climate Model Diagnosis and Intercomparison (PCMDI) and the World Climate Research Programme's (WCRP's) Working Group on Coupled Modelling (WGCM) for their roles in making available the WCRP CMIP3 multi-model dataset. Support of the WCRP CMIP3 dataset is provided by the Office of Science, U.S. Department of Energy. Any use of trade, firm, or product names is for descriptive purposes only and does not imply endorsement by the U.S. Government.

## Author Contributions

Conceived and designed the experiments: SLS EMG. Wrote the paper: SLS PJB EMG RTP. Created and analyzed data: SLS PJB RTP.

## References

1. Davis MB, Shaw RG. Range shifts and adaptive responses to Quaternary climate change. *Science*. 2001; 292: 673–679. PMID: [11326089](#)
2. Blois JL, Zametske PL, Fitzpatrick MC, Finnegan S. Climate change and the past, present, and future of biotic interactions. *Science*. 2013; 341: 499–504. doi: [10.1126/science.1237184](#) PMID: [23908227](#)
3. Scholze M, Knorr W, Arnell NW, Prentice IC. A climate-change risk analysis for world ecosystems. *Proc Natl Acad Sci. U S A* 2006; 103: 13116–13120. PMID: [16924112](#)
4. Warszawski L, Friend A, Ostberg S, Frieler K, Lucht W, Schaphoff S, et al. A multi-model analysis of risk of ecosystem shifts under climate change. *Environ Res Lett*. 2013; 8: 044018 (10 pp), doi: [10.1088/1748-9326/8/4/044018](#)
5. Settele J, Scholes R, Betts R, Bunn S, Leadley P, Nepstad D, et al. Terrestrial and inland water systems. In: Field CB, Barros VR, Dokken DJ, Mach KJ, Mastrandrea MD, Bilir TE, et al., editors. *Climate change 2014: impacts, adaptation, and vulnerability*. Cambridge, UK: Cambridge University Press; 2014. pp. 271–359.
6. Doherty RM, Sitch S, Smith B, Lewis SL, Thornton PK. Implications of future climate and atmospheric CO<sub>2</sub> content for regional biogeochemistry, biogeography and ecosystem services across East Africa. *Glob Change Biol*. 2010; 16: 617–640.
7. Liu Z, Notaro M, Kutzbach J. Assessing global vegetation-climate feedbacks from observations. *J Clim*. 2006; 19: 787–814.
8. Pearson RG, Dawson TP. Predicting the impacts of climate change on the distribution of species: are bioclimate envelope models useful? *Glob Ecol Biogeogr*. 2003; 12: 361–371.
9. Prentice IC, Bondeau A, Cramer W, Harrison SP, Hickler T, Lucht W, et al. Dynamic global vegetation modeling: quantifying terrestrial ecosystem responses to large-scale environmental change. In:

- Canadell JG, Pataki DE, Pitelka LF, editors. Terrestrial ecosystems in a changing world. Berlin: Springer; 2007. pp. 175–192.
10. Rehfeldt GE, Crookston NL, Sáenz-Romero C, Campbell EM. North American vegetation model for land-use planning in a changing climate: a solution to large classification problems. *Ecol Appl*. 2012; 22: 119–141. PMID: [22471079](#)
11. Hickler T, Fronzek S, Araújo MB, Schweiger O, Thuiller W, Sykes MT. An ecosystem model-based estimate of changes in water availability differs from water proxies that are commonly used in species distributions models. *Glob Ecol Biogeogr*. 2009; 18: 304–313.
12. Sitch S, Smith B, Prentice IC, Arneth A, Bondeau A, Cramer W, et al. Evaluation of ecosystem dynamics, plant geography and terrestrial carbon cycling in the LPJ dynamic global vegetation model. *Glob Change Biol*. 2003; 9: 161–185.
13. Zhao D, Wu S, Yin Y. Responses of terrestrial ecosystems' net primary productivity to future regional climate change in China. *PLoS ONE*. 2013; 8: e60849. doi: [10.1371/journal.pone.0060849](#) PMID: [23593325](#)
14. Jiang X, Rauscher SA, Ringler TD, Lawrence DM, Williams AP, Allen CD, et al. Projected future changes in vegetation in western North America in the twenty-first century. *J Clim*. 2013; 26: 3671–3687.
15. U.S. Geological Survey. Grayscale North America shaded relief—1 kilometer resolution. National Atlas of the United States; 2002. Database: U.S. Geological Survey National Atlas [Internet]. Available: <http://nationalatlas.gov>.
16. Sitch S, Huntingford C, Gedney N, Levy PE, Lomas M, Piao SL, et al. Evaluation of the terrestrial carbon cycle, future plant geography and climate-carbon cycle feedbacks using five Dynamic Global Vegetation Models (DGVMs). *Glob Change Biol*. 2008; 14: 1–25.
17. Leuzinger S, Manusch C, Bugmann H, Wolf A. A sink-limited growth model improves biomass estimation along boreal and alpine tree lines. *Glob Ecol Biogeogr*. 2013; 22: 924–932.
18. Notaro M, Liu Z, Gallimore RG, Williams JW, Gutzler DS, Collins S. Complex seasonal cycle of ecohydrology in the southwest United States. *J Geophys Res*. 2010; 115: G04034.
19. Prentice IC, Harrison SP, Bartlein PJ. Global vegetation and terrestrial carbon cycle changes after the last ice age. *New Phytol*. 2011; 189: 988–998. doi: [10.1111/j.1469-8137.2010.03620.x](#) PMID: [21288244](#)
20. Polley HW, Briske DD, Morgan JA, Wolter K, Bailey DW, Brown JR. Climate change and North American rangelands: trends, projections, and implications. *Rangeland Ecol Manage*. 2013; 66: 493–511.
21. Prentice IC, Harrison SP. Ecosystem effects of CO<sub>2</sub> concentration: evidence from past climates. *Climate of the Past*. 2009; 5: 297–307.
22. Farr TG, Rosen PA, Caro E, Crippen R, Duren R, Hensley S, et al. The shuttle radar topography mission. *Rev Geophys*. 2007; 45: RG2004. doi: [10.1029/2005RG000183](#)
23. Global Soil Data Task. Global Soil Data Products CD-ROM (IGBP-DIS). CD-ROM. Potsdam, Germany: International Geosphere-Biosphere Programme, Data and Information System. 2000. Available: <https://daac.ornl.gov/SOILS/guides/igbp.html>
24. Saxton KE, Rawls WJ, Romberger JS, Papendick RI. Estimating generalized soil-water characteristics from texture. *Soil Sci Soc Am J*. 1986; 50: 1031–1036.
25. Miller DA, White RA. A conterminous United States multilayer soil characteristics dataset for regional climate and hydrology modeling. *Earth Interactions*. 1998; 2: 1–26.
26. Jackson RB, Canadell J, Ehleringer JR, Mooney HA, Sala OE, Schulze ED. A global analysis of root distributions for terrestrial biomes. *Oecologia*. 1996; 108: 389–411.
27. New M, Hulme M, Jones P. Representing twentieth-century space-time climate variability. Part I: Development of a 1961–90 mean monthly terrestrial climatology. *J Clim*. 1999; 12: 829–856.
28. New M, Lister D, Hulme M, Makin I. A high-resolution data set of surface climate over global land areas. *Clim Res*. 2002; 21: 1–25.
29. Mitchell TD, Jones PD. An improved method of constructing a database of monthly climate observations and associated high-resolution grids. *Intl J Climatol*. 2005; 25: 693–712.
30. Doorenbos J, Pruitt WO. Guidelines for predicting crop water requirements. Rep. 24. Rome, Italy: Food and Agriculture Organisation; 1977.
31. Hulme M, Conway D, Jones PD, Jiang T, Barrow EM, Turney C. Construction of a 1961–1990 European climatology for climate change modeling and impact applications. *Intl J Climatol*. 1995; 15: 1333–1363.
32. Collins WD, Bitz CM, Blackmon ML, Bonan GB, Bretherton CS, Carton JA, et al. The Community Climate System Model Version 3 (CCSM3). *J Clim*. 2006; 19: 2122–2143.

33. Scinocca JF, McFarlane NA, Lazare M, Li J, Plummer D. The CCCma third generation AGCM and its extension into the middle atmosphere. *Atmos Chem Phys*. 2008; 8: 7055–7074.
34. Schmidt GA, Ruedy R, Hansen JE, Aleinov I, Bell N, Bauer M, et al. Present-day atmospheric simulations using GISS ModelE: Comparison to in situ, satellite, and reanalysis data. *J Clim*. 2006; 19: 153–192.
35. K–1 Model Developers. K–1 coupled GCM (MIROC) description. Hasumi H, Emori S, editors. Tokyo, Japan: Center for Climate System Research, University of Tokyo; 2004.
36. Pope V, Gallani ML, Rowntree PR, Stratton RA. The impact of new physical parameterizations in the Hadley Centre climate model: HadAM3. *Clim Dyn*. 2000; 16: 123–146.
37. Mote PW, Salathé EP Jr. Future climate in the Pacific Northwest. *Clim Change*. 2010; 102: 29–50.
38. Stocker TF, Qin D, Plattner G-K, Alexander LV, Allen SK, Bindoff NL, et al. Technical Summary. In: Stocker TF, Qin D, Plattner G-K, Tignor M, Allen SK, Boschung J, et al., editors. *Climate Change 2013: The Physical Science Basis. Contribution of Working Group I to the Fifth Assessment Report of the Intergovernmental Panel on Climate Change*. Cambridge, UK: Cambridge University Press; 2013. pp. 33–115.
39. Nakićenović N, Alcamo J, Davis G, de Vries B, Fenhann J, Gaffin S, et al. Special report on emissions scenarios. Cambridge, UK: Cambridge University Press; 2000.
40. Rogelj J, Meinshausen M, Knutti R. Global warming under old and new scenarios using IPCC climate sensitivity range estimates. *Nat Clim Chang*. 2012.
41. Shafer SL, Bartlein PJ. Statistically-downscaled monthly historical (1901–2000) CRU TS 2.1 and projected future (2001–2099) CMIP3 A2 and A1B simulated temperature, precipitation, and sunshine data on a 30-second grid of the northwest United States and southwest Canada, version 1.0. U.S. Geological Survey Data Release; 2015. doi: [10.5066/F7H70CWW](https://doi.org/10.5066/F7H70CWW)
42. Cleveland WS. Visualizing data. Summit, New Jersey: Hobart Press; 1993.
43. Prentice IC, Kelley DI, Foster PN, Friedlingstein P, Harrison SP, Bartlein PJ. Modeling fire and the terrestrial carbon balance. *Global Biogeochem Cycles*. 2011; 25: GB3005. doi: [10.1029/2010GB003906](https://doi.org/10.1029/2010GB003906)
44. Prentice IC, Farquhar GD, Fasham MJR, Goulden ML, Heimann M, Jaramillo VJ, et al. The carbon cycle and atmospheric carbon dioxide. In: Houghton JT, Ding Y, Griggs DJ, Noguer M, van der Linden PJ, Dai X, et al., editors. *Climate change 2001: The scientific basis*. Cambridge, UK: Cambridge University Press; 2001. pp. 183–237.
45. Thonicke K, Venevsky S, Sitch S, Cramer W. The role of fire disturbance for global vegetation dynamics: coupling fire into a dynamic global vegetation model. *Glob Ecol Biogeogr*. 2001; 10: 661–677.
46. Shafer SL, Bartlein PJ. LPJ biomes (30-year mean) simulated using monthly historical (1901–2000) CRU TS 2.1 climate data and projected future (2001–2099) CMIP3 A2 and A1B simulated climate data on a 30-second grid of the northwest United States and southwest Canada, version 1.0. U.S. Geological Survey Data Release; 2015. doi: [10.5066/F73X84PH](https://doi.org/10.5066/F73X84PH)
47. Thompson RS, Anderson KH, Bartlein PJ. Atlas of relations between climatic parameters and distributions of important trees and shrubs in North America—Introduction and Conifers. U.S. Geological Survey Professional Paper 1650-A; 1999a.
48. Thompson RS, Anderson KH, Bartlein PJ. Atlas of relations between climatic parameters and distributions of important trees and shrubs in North America—Introduction and Conifers. U.S. Geological Survey Professional Paper 1650-B; 1999b.
49. Küchler AW. Potential natural vegetation of the conterminous United States. American Geographical Society, Special Publication No. 36; 1964.
50. Conservation Biology Institute. U.S. potential natural vegetation, original Kuchler types, v2.0 (spatially adjusted to correct geometric distortions); 2012. Available: <http://databasin.org/datasets/1c7a301c8e6843f2b4fe63fdb3a9fe39>.
51. National Center for Earth Resources Observation and Science, U.S. Geological Survey. North American Land Cover Characteristics – 1-Kilometer Resolution; 2002. Database: National Atlas of the United States [Internet]. Available: <http://nationalatlas.gov/>.
52. Rogers BM, Neilson RP, Drapek R, Lenihan JM, Wells JR, Bachelet D, et al. Impacts of climate change on fire regimes and carbon stocks of the Pacific Northwest. *J Geophys Res*. 2011; 116: G03037.
53. Franklin JF, Dyrness CT. Natural vegetation of Oregon and Washington. USDA Forest Service General Technical Report PNW–8; 1973.
54. Bachelet D, Neilson RP, Hickler T, Drapek RJ, Lenihan JM, Sykes MT, et al. Simulating past and future dynamics of natural ecosystems in the United States. *Global Biogeochem Cycles*. 2003; 17: 1045.
55. Christy JA, Alverson ER. Historical vegetation of the Willamette Valley, Oregon, circa 1850. *Northwest Sci*. 2011; 85: 93–107.



56. Walsh MK, Whitlock C, Bartlein PJ. 1200 years of fire and vegetation history in the Willamette Valley, Oregon and Washington, reconstructed using high-resolution macroscopic charcoal and pollen analysis. *Palaeogeogr Palaeoclimatol Palaeoecol*. 2010; 297: 273–289.
57. Hessburg PF, Agee JK. An environmental narrative of inland Northwest United States forests, 1800–2000. *For Ecol Manage*. 2003; 178: 23–59.
58. Pfeiffer M, Spessa A, Kaplan JO. A model for global biomass burning in preindustrial time: LPJ-LMfire (v1.0). *Geoscientific Model Development*. 2013; 6: 643–685.
59. Thonicke K, Spessa A, Prentice IC, Harrison SP, Dong L, Carmona-Moreno C. The influence of vegetation, fire spread and fire behaviour on biomass burning and trace gas emissions: results from a process-based model. *Biogeosciences*. 2010; 7: 1991–2011.
60. Miller RF, Rose JA. Fire history and western juniper encroachment in sagebrush steppe. *J Range Manage*. 1999; 52: 550–559.
61. Gerber S, Joos F, Prentice IC. Sensitivity of a dynamic global vegetation model to climate and atmospheric CO<sub>2</sub>. *Glob Chang Biol*. 2004; 10: 1223–1239.
62. Smith WK, Germino MJ, Johnson DM, Reinhardt K. The altitude of alpine treeline: a bellwether of climate change effects. *Botanical Rev*. 2009; 75: 163–190.
63. Bachelet D, Lenihan, JM, Daly C, Neilson RP, Ojima DS, and Parton WJ. MC1: A dynamic vegetation model for estimating the distribution of vegetation and associated ecosystem fluxes of carbon, nutrients, and water, Version 1.0., Gen. Tech. Rep., PNW-GTR–508, 95 pp., Pac. Northwest Res. Stn., For. Serv., U.S. Dep. of Agric., Portland, Oreg. 2001.
64. Hamann A, Wang T. Potential effects of climate change on ecosystem and tree species distribution in British Columbia. *Ecology*. 2006; 87: 2773–2786. PMID: [17168022](#)
65. Houghton JT, Meira Filho LG, Callander BA, Harris N, Kattenberg A, Maskell K, editors. *Climate change 1995: the science of climate change*. Cambridge, UK: Cambridge University Press; 1996.
66. Giorgi F. Climate change prediction. *Clim Change*. 2005; 73: 239–265.
67. Bentz BJ, Régnière J, Fettig CJ, Hansen EM, Hayes JL, Hicke JA, et al. Climate change and bark beetles of the western United States and Canada: direct and indirect effects. *Bioscience*. 2010; 60: 602–613.
68. Hickler T, Prentice IC, Smith B, Sykes MT, Zaehle S. Implementing plant hydraulic architecture within the LPJ Dynamic Global Vegetation Model. *Glob Ecol Biogeogr*. 2006; 15: 567–577.
69. Wania R, Ross I, Prentice IC. Integrating peatlands and permafrost into a dynamic global vegetation model: 1. Evaluation and sensitivity of physical land surface processes. *Global Biogeochem Cycles*. 2009; 23, GB3014, doi: [10.1029/2008GB003412](#)
70. Gerten D, Schaphoff S, Haberlandt U, Lucht W, Sitch S. Terrestrial vegetation and water balance—hydrological evaluation of a dynamic global vegetation model. *J Hydrol (Amst)*. 2004; 286: 249–270.
71. Wuebbles D, Meehl G, Hayhoe K, Karl TR, Kunkel K, Santer B, et al. CMIP5 climate model analyses: climate extremes in the United States. *Bulletin of the American Meteorological Society*. 2014; 95: 571–583.
72. Smith B, Prentice IC, Sykes MT. Representation of vegetation dynamics in the modelling of terrestrial ecosystems: comparing two contrasting approaches within European climate space. *Glob Ecol Biogeogr*. 2001; 10: 621–637.
73. Hickler T, Vohland K, Feehan J, Miller PA, Smith B, Costa L, et al. Projecting the future distribution of European potential natural vegetation zones with a generalized, tree species-based dynamic vegetation model. *Glob Ecol Biogeogr*. 2012; 21: 50–63.
74. Zaehle S, Sitch S, Smith B, Hatterman F. Effects of parameter uncertainties on the modeling of terrestrial biosphere dynamics. *Global Biogeochem Cycles*. 2005; 19, GB3020.
75. Coops NC, Waring RH. Estimating the vulnerability of fifteen tree species under changing climate in Northwest North America. *Ecol Modell*. 2011; 222: 2119–2129.
76. Groves CR, Game ET, Anderson MG, Cross M, Enquist C, Ferdaña Z, et al. Incorporating climate change into systematic conservation planning. *Biodivers and Conserv*. 2012; 21: 1651–1671.
77. Cross MS, Zavaleta ES, Bachelet D, Brooks ML, Enquist CAF, Fleishman E, et al. The Adaptation for Conservation Targets (ACT) Framework: A Tool for Incorporating Climate Change into Natural Resource Management. *Environ Manage*. 2012; 50: 341–351. doi: [10.1007/s00267-012-9893-7](#) PMID: [22773068](#)
